# Supplementary material for: The Regional Coupled Suite (RCS-IND1): application of a flexible regional coupled modelling framework to the Indian region at km-scale
Source: Copernicus journal article supplement (doi:10.5194/gmd-2022-7), 2022-01-27
Supplement: Supplementary file 1 [file gmd-2022-7-supplement.pdf]

## Supplementary Material to:

# The Regional Coupled Suite (RCS-IND1): application of a flexible regional coupled modelling framework to the Indian region at km-scale

Juan M. Castillo<sup>1</sup>, Huw W. Lewis<sup>1</sup>, Akhilesh Mishra<sup>2</sup>, Ashis Mitra<sup>2</sup>, Jeff Polton<sup>3</sup>, Ashley Brereton<sup>3</sup>, Andrew Saulter<sup>1</sup>, Alex Arnold<sup>1</sup>, Segolene Berthou<sup>1</sup>, Douglas Clark<sup>4</sup>, Julia Crook<sup>5</sup>, Ananda Das<sup>6</sup>, John Edwards<sup>1</sup>, Xiangbo Feng<sup>7</sup>, Ankur Gupta<sup>2</sup>, Sudheer Joseph<sup>8</sup>, Nicholas Klingaman<sup>7</sup>, Imranali Momin<sup>2</sup>, Christine Pequignet<sup>1</sup>, Claudio Sanchez<sup>1</sup>, Jennifer Saxby<sup>5</sup>, Maria Valdivieso da Costa<sup>7</sup>

<sup>1</sup>Met Office, Exeter, EX1 3PB, UK

<sup>2</sup>National Centre for Medium Range Weather Forecasting (NCMRWF), India

<sup>3</sup>National Oceanography Centre, Liverpool, UK

<sup>4</sup>UK Centre of Ecology & Hydrology (UKCEH), UK

<sup>5</sup>University of Leeds, UK

<sup>6</sup>India Meteorological Department (IMD), India

<sup>7</sup>University of Reading, UK

<sup>8</sup>INCOIS, India

*Correspondence to:* Juan M. Castillo (juan.m.castillo@metoffice.gov.uk)

## S1 Introduction

This supplementary material to the main paper is designed to help users of the RCS-IND1 framework to configure their systems appropriately. Interested researchers are strongly encouraged to contact the corresponding author and to be provided with access to configurations as a rose suite via the <https://code.metoffice.gov.uk/trac/roses-u/browser/b/f/9/4/5/trunk> repository.

## S2 Example rose namelists for RCS-IND1 configurations of UM, JULES, NEMO and WAVEWATCH III namelists

The provided text file gmd-2022-rs-ind1-namelists.txt includes a set of UM, JULES, NEMO and WAVEWATCH III rose namelists for an atmosphere-ocean-wave simulation run of the RCS-IND1 configuration, using UM code base vn11.1, JULES vn5.2, NEMO vn4.1, WAVEWATCHIII vn4.18.

## S3 Code modifications applied for RCS-IND1

A number of code adaptations were required in order to develop the RCS-IND1 configuration, and associated component model configurations. These are summarised below. All code modifications were implemented as distinct branches from the baseline code (e.g. trunk). These branches are merged to form a single code set as part of the fcm\_make configuration build process within each rose suite prior to running. For convenience, a copy of the merged code for each component is made available to registered researchers to support collaboration, as described in the main paper (Code Availability section).

The following tables provide supplementary detail on the underpinning code branches used for RCS-IND1. All are also accessible to registered researchers, although the authors would recommend either working with the provided copy of the merged code or preferably making use of the rose suites described which include automated extraction, merging and compilation of the relevant codes from the various repositories using the fcm\_make functionality.

| Met Office Unified Model branch name | Code revision            | Purpose                                            |
|--------------------------------------|--------------------------|----------------------------------------------------|
| ukeputils/trunk/gmd-2022/rcs-ind1/um | <a href="#">RCS-IND1</a> | Merged copy of RCS-IND1 UM code                    |
| <i>Contains merge of:</i>            |                          |                                                    |
| vn11.1 trunk                         | <a href="#">56263</a>    | Root UM vn11.1 code base, tagged um11.1            |
| paulselwood/vn11.1_fix_gwd4a_race    | <a href="#">57003</a>    | Technical branch to correct race condition in GWD  |
| paulselwood/vn11.1_fix_ukv           | <a href="#">57531</a>    | Technical branch to correct OMP behaviour          |
| juanmcastillo/vn11.1_ukep_rivrouting | <a href="#">61978</a>    | Enable relevant river routing diagnostics in JULES |
| juanmcastillo/vn11.1_wave_coupling   | <a href="#">60846</a>    | Add wave coupling capability to UM                 |

**Table S1: Summary of Unified Model code branches merged and used in the RCS-IND1 framework, containing relevant adaptations from the version 11.1 baseline code. All model codes are accessible via <https://code.metoffice.gov.uk/trac/um/wiki>. Registered users can directly access the copy of the merged code provided and each separate code branch listed at the revision used in RCS-IND1 by following the direct code revision links provided in the Table.**

| JULES land surface model branch name       | Code revision            | Purpose                                                 |
|--------------------------------------------|--------------------------|---------------------------------------------------------|
| ukeputils/trunk/gmd-2022/rcs-ind1/jules    | <a href="#">RCS-IND1</a> | Merged copy of RCS-IND1 JULES code                      |
| <i>Contains merge of:</i>                  |                          |                                                         |
| vn5.2 trunk                                | <a href="#">12251</a>    | Root JULES vn5.2 code base, tagged um11.1               |
| juanmcastillo/vn5.2_river_fixes            | <a href="#">12815</a>    | Apply trunk code modification to routing not at vn4.7   |
| juanmcastillo/vn5.2_wave_coupling-Charnock | <a href="#">12950</a>    | Implement wave coupling within surface exchange         |
| johnmedwards/vn5.2_debug_surfex2           | <a href="#">12834</a>    | Modify iterative initial condition for surface exchange |

**Table S2: Summary of JULES code branches merged and used in the RCS-IND1 framework, containing relevant adaptations from the version 5.2 baseline code. All model codes are accessible via <https://code.metoffice.gov.uk/trac/jules/wiki>. Registered users can directly access the copy of the merged code provided and each separate code branch listed at the revision used in RCS-IND1 by following the direct code revision links provided in the Table.**

| NEMO ocean model branch name           | Code revision            | Purpose                                    |
|----------------------------------------|--------------------------|--------------------------------------------|
| ukeputils/trunk/gmd-2022/rcs-ind1/nemo | <a href="#">RCS-IND1</a> | Merged copy of RCS-IND1 NEMO code          |
| <i>Contains merge of:</i>              |                          |                                            |
| vn4.0.1 trunk                          | <a href="#">12083</a>    | Root NEMO vn4.0.1 code revision used       |
| UKMO/r8395_India_uncoupled             | <a href="#">11080</a>    | Amend boundary data vertical interpolation |
| UKMO/r8395_cpl-pressure                | <a href="#">11080</a>    | Use coupled MSLP rather than file forcing  |
| UKMO/r8395_coupling_sequence           | <a href="#">10764</a>    | Set the required order of coupling fields  |
| UKMO/r8395_restart_datestamp           | <a href="#">10765</a>    | Add timestamp to NEMO restart file         |
| UKMO/r8935_mix-lyr_diag                | <a href="#">11347</a>    | Additional mixed-layer diagnostics         |

60 **Table S3: Summary of NEMO code branches merged and used in the RCS-IND1 framework, containing relevant adaptations from the baseline trunk code at version 4.0.1 (revision 12083). Model codes are accessible via <http://www.nemo-ocean.eu>. Registered users can directly access the copy of the merged code provided and each separate code branch listed at the revision used in RCS-IND1 by following the direct code revision links provided.**

| NEMO compilation keys used in RCS-IND1 |                                          |
|----------------------------------------|------------------------------------------|
| key_zdfgls                             | GLS generic length scale vertical mixing |
| key_FES14_tides                        | Tidal potential forcing                  |
| key_iomput                             | Model output via XIOS with I/O server    |
| key_netcdf4                            | Netcdf support                           |
| key_oasis3                             | Enable coupling with OASIS3-MCT          |
| key_oa3mct_v3                          | Enable coupling with OASIS3-MCT          |

65 **Table S4: Summary of NEMO v4.0.1 compilation keys used in the RCS-IND1 framework.**

| WAVEWATCH III branch name               | Code revision            | Purpose                                        |
|-----------------------------------------|--------------------------|------------------------------------------------|
| ukeputils/trunk/gmd-2022/rcs-ind1/wav   | <a href="#">RCS-IND1</a> | Copy of RCS-IND1 WAVEWATCH III code            |
| <i>Contains:</i>                        |                          |                                                |
| WW3v4/branches/dev/frhl/r966_ww3v4_ukep | <a href="#">2211</a>     | New implementation of wave coupling to ATM/OCN |

70 **Table S5: Summary of WAVEWATCH III code branch used in the RCS-IND1 framework, containing relevant adaptations from the baseline trunk code at version 4.18. This code can be shared with registered users of WAVEWATCHIII, with further details available at <https://polar.ncep.noaa.gov/waves/wavewatch/wavewatch.shtml>.**

| WAVEWATCH III compilation switches used in RCS-IND1 |                                             |      |                                                  |
|-----------------------------------------------------|---------------------------------------------|------|--------------------------------------------------|
| ST4                                                 | Ardhuin et al. (2010) source term package   | SMC  | Spherical Multi-Cell coordinate system           |
| NL1                                                 | Discrete interaction approximation          | WNT1 | Linear wind speed interpolation in time          |
| BT1                                                 | JONSWAP bottom friction formulation         | CRT1 | Linear current interpolation in time             |
| DB1                                                 | Battjes-Janssen depth-induced breaking      | WNX1 | Approx. linear wind speed interpolation in space |
| TR0                                                 | No triad interactions                       | CRX1 | Approx. linear current interpolation in space    |
| BS0                                                 | No bottom scattering                        | FLX0 | Flux computation included in source terms        |
| XX0                                                 | No supplemental source terms                | RWND | Correct wind speeds for current velocity         |
| LN1                                                 | Cavaleri and Malanotte-Rizzoli linear input | REF0 | No source term for reflection                    |

**Table S6: Summary of WAVEWATCH III compile switches used in the RCS-IND1 framework.**

75

| KPP branch name                                                           | Code revision            | Purpose                   |
|---------------------------------------------------------------------------|--------------------------|---------------------------|
| ukeputils/trunk/gmd-2022/rcs-ind1/kpp                                     | <a href="#">RCS-IND1</a> | Copy of RCS-IND1 KPP code |
| <i>Contains:</i>                                                          |                          |                           |
| KPP_ocean_svn/KPP_ocean/branches/dev/had<br>zc/r194_r183_couple_flags_OMP | <a href="#">194</a>      | Development branch        |

**Table S7: Summary of KPP code branch used in the RCS-IND1 framework, containing relevant adaptations from the baseline trunk code at <http://cms.ncas.ac.uk/wiki/PumaService>**

80

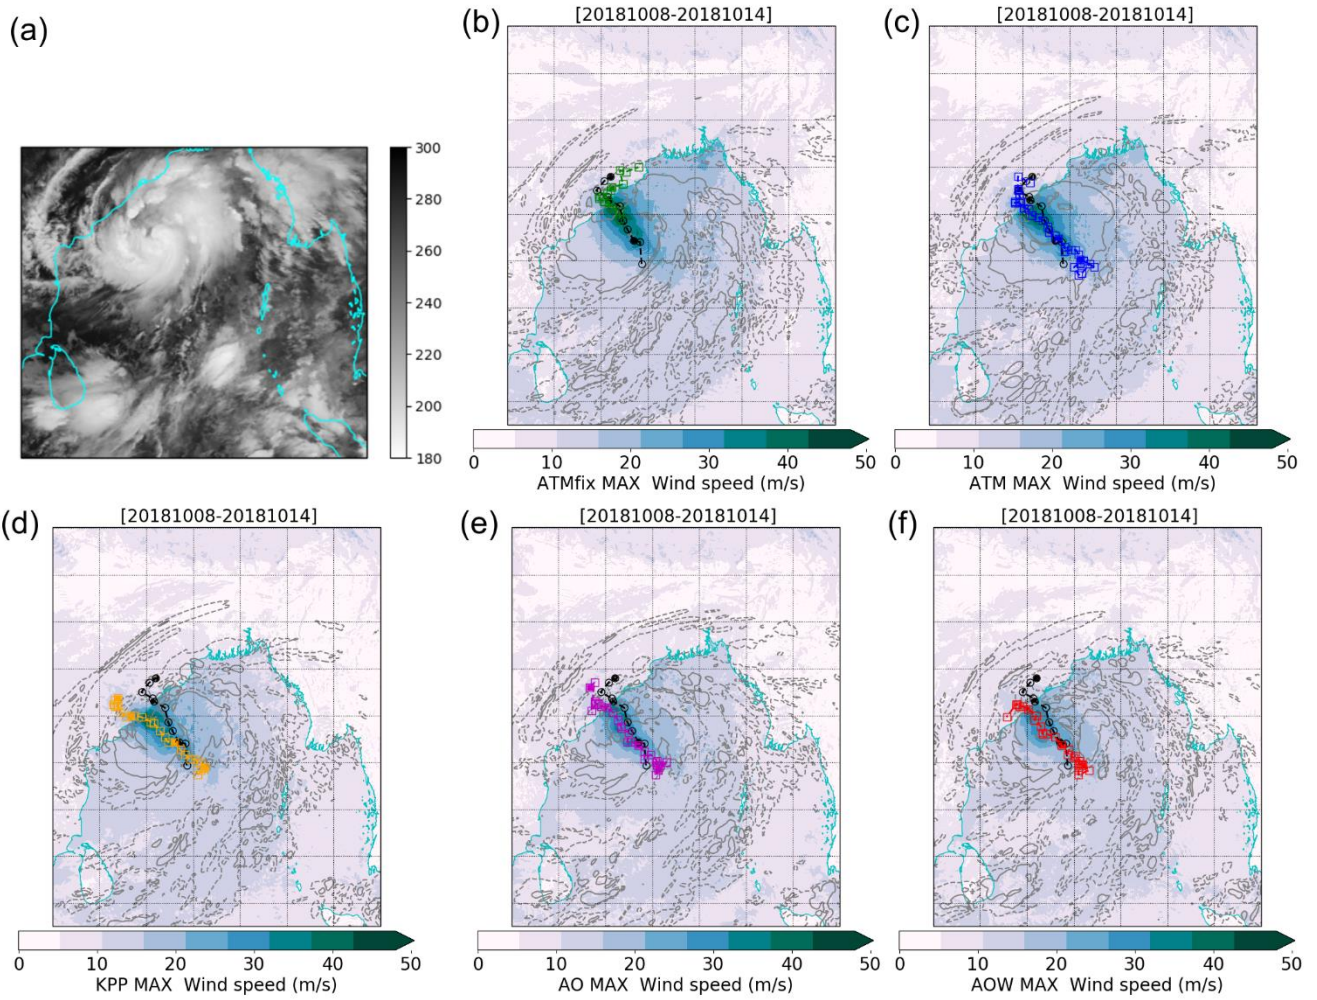

**Figure S1: (a) Illustration of Cyclone Titli satellite observed brightness temperature from Meteosat at 00 UTC on 10 October 2018. In (b)-(f), results from RCS-IND1 experiments showing maximum wind speed during the 7-day simulation (coloured shading). Also plotted is the diagnosed simulated cyclone track at 3-hourly intervals (coloured line and squares) compared with observed track at 6-hourly intervals (black line and circles). Line contours show instantaneous simulated outgoing longwave radiation at top of atmosphere (dashed line indicating  $150 \text{ Wm}^{-2}$ , solid line  $100 \text{ Wm}^{-2}$  contour) at coincident hour to the satellite observation in (a). See Figure 3 for corresponding figure for simulations with frictional heating enabled.**



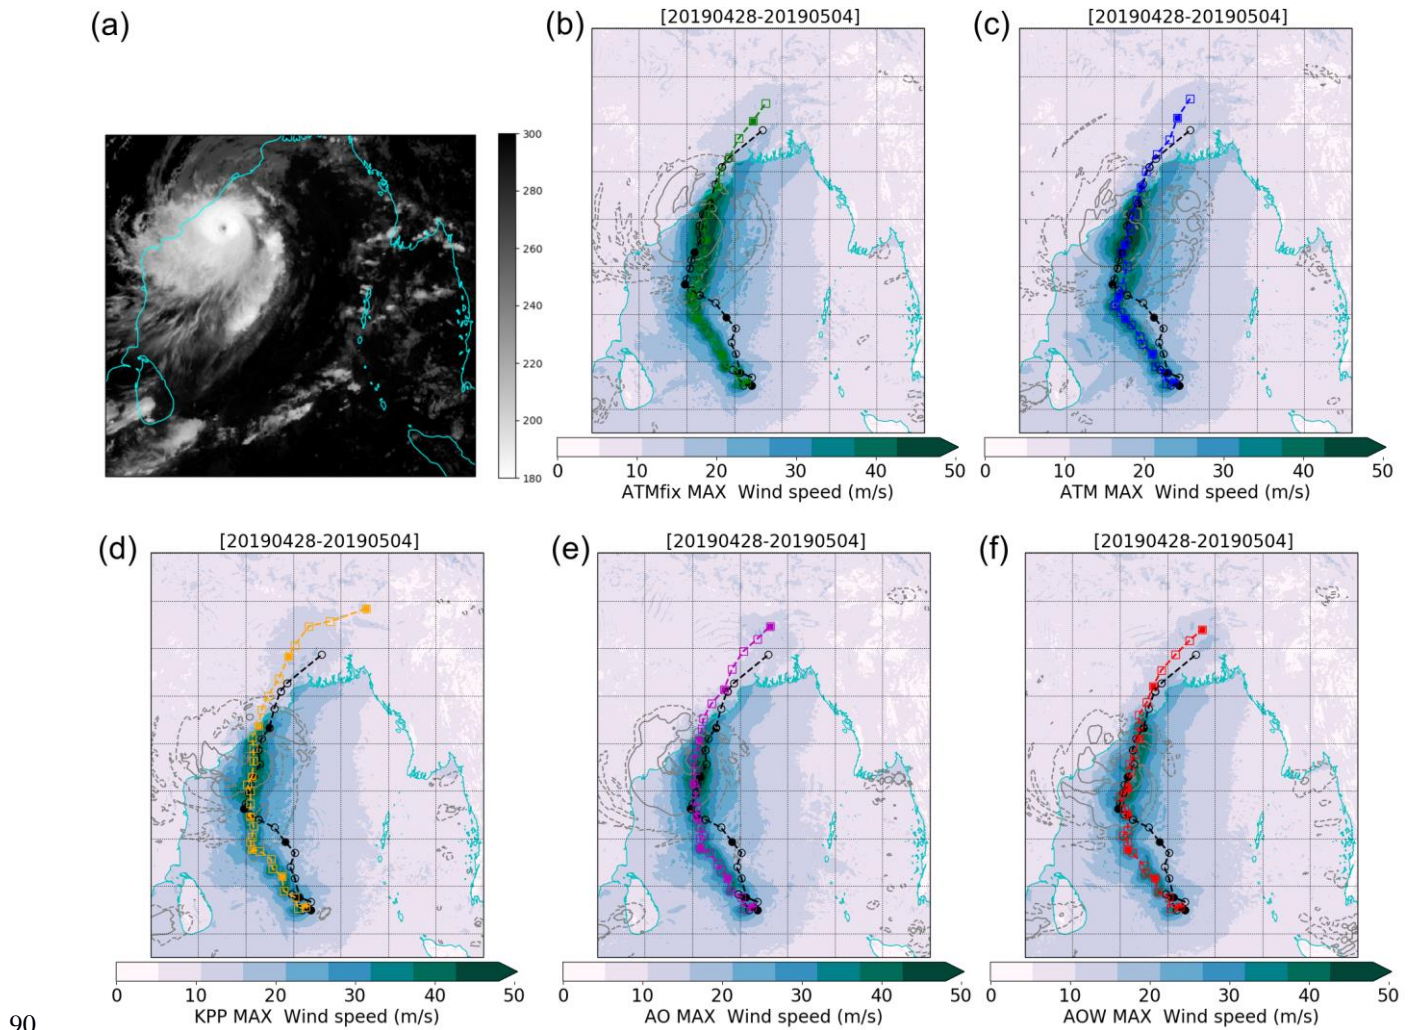

**Figure S2:** (a) Illustration of Cyclone Fani satellite observed brightness temperature from INSAT at 06 UTC on 2 May 2019. In (b)-(f), results from RCS-IND1 experiments showing maximum wind speed during the 7-day simulation (coloured shading). Also plotted is the diagnosed simulated cyclone track at 6-hourly intervals (coloured line and squares) compared with observed track at 6-hourly intervals (black line and circles). Line contours show instantaneous simulated outgoing longwave radiation at top of atmosphere (dashed line indicating  $150 \text{ Wm}^{-2}$ , solid line  $100 \text{ Wm}^{-2}$  contour) at coincident hour to the satellite observation in (a). See Figure 4 for corresponding figure for simulations with frictional heating enabled.

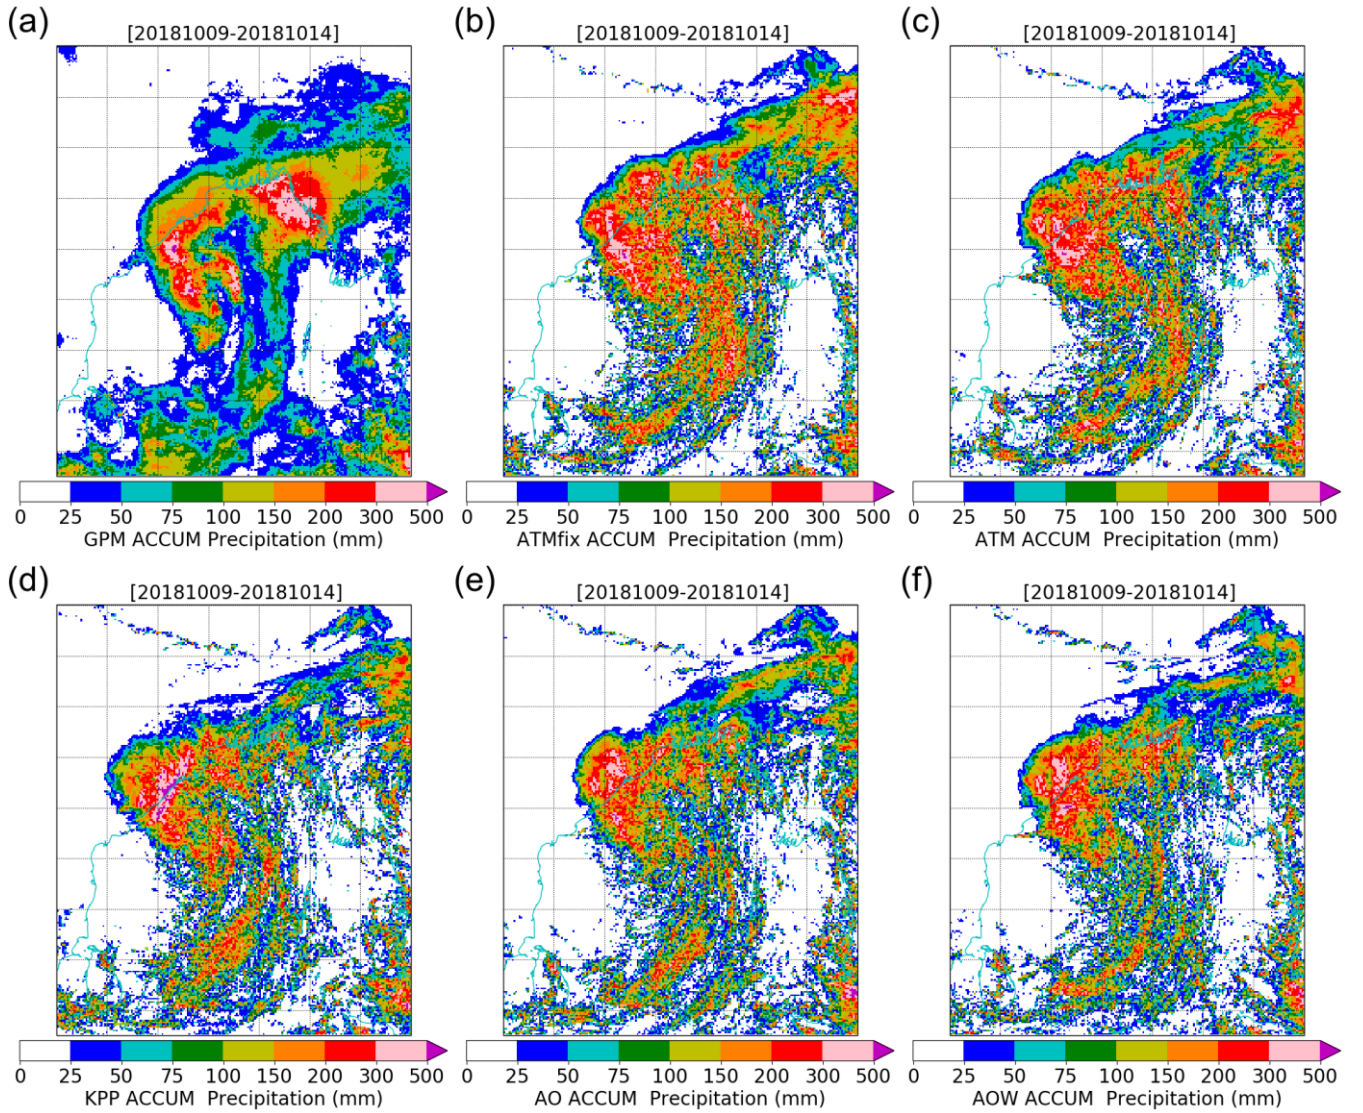

**Figure S3: 7-day precipitation accumulation during Titli case study over Bay of Bengal sub-domain region (a) observed by GPM (NASA Global Precipitation Measurement), and simulated by (b) ATMfix\_FH, (c) ATM\_FH, (d) KPP\_FH, (e) AO\_FH and (f) AOW\_FH. All simulated data are interpolated to the GPM resolution prior to computing accumulations. See Figure 10 for corresponding figure for simulations with frictional heating enabled.**



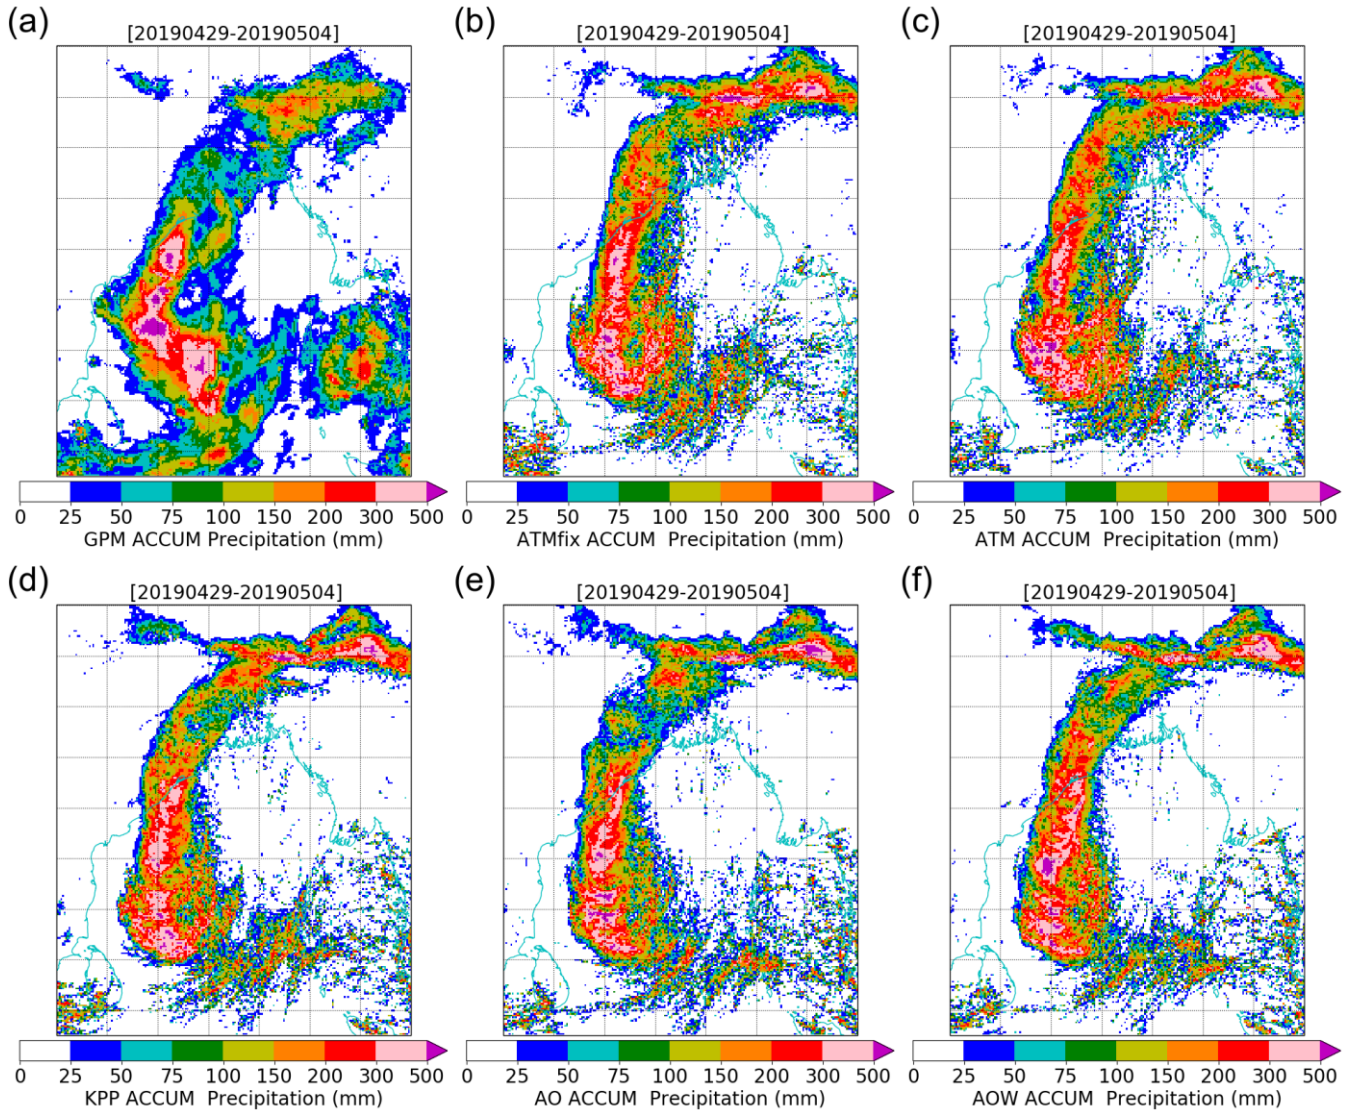

**Figure S4: 7-day precipitation accumulation during Fani case study over Bay of Bengal sub-domain region (a) observed by GPM (NASA Global Precipitation Measurement), and simulated by (b) ATMfix\_FH, (c) ATM\_FH, (d) KPP\_FH, (e) AO\_FH and (f) AOW\_FH. All simulated data are interpolated to the GPM resolution prior to computing accumulations. See Figure 11 for corresponding figure for simulations with frictional heating enabled.**
